# Supplementary material
Source: PubMed Central journal article supplement (PMC7747347)
Supplement: 40820_2016_108_MOESM1_ESM.pdf [file 40820_2016_108_MOESM1_ESM.pdf]

Supporting Information for

## **Electrochemical Impedance Analysis of Biofunctionalized Conducting Polymer modified Graphene-CNTs Nanocomposite for Protein Detection**

Shobhita Singal<sup>1,2</sup>, Avanish K Srivastava<sup>1</sup>, Rajesh<sup>1,2,\*</sup>

<sup>1</sup>CSIR-National Physical Laboratory, Dr. K.S. Krishnan Road, New Delhi-110012, India

<sup>2</sup>Academy of Scientific and Innovative Research (AcSIR), CSIR-National Physical Laboratory, Dr. K.S. Krishnan Road, New Delhi-110012, India

\*Corresponding author. E-mail: [rajesh\\_csir@yahoo.com](mailto:rajesh_csir@yahoo.com)

### **Raman Spectra of G-MWCNT Hybrid**

Figure S1 shows the acquired Raman spectra of the hybrid on copper foil. The D peak is observed at  $1358\text{ cm}^{-1}$ , arising due to the presence of structural disorder such as grain boundaries, in the G-MWCNT hybrid. The second peak is the G peak, observed at  $1588\text{ cm}^{-1}$ , corresponds to the C-C bond stretching vibration in the graphitic plane. The third common peak, commonly referred as 2D peak appears due to the second order vibrations of the C-C bond and provides information about the two dimensional graphitic stacking of the carbon material.

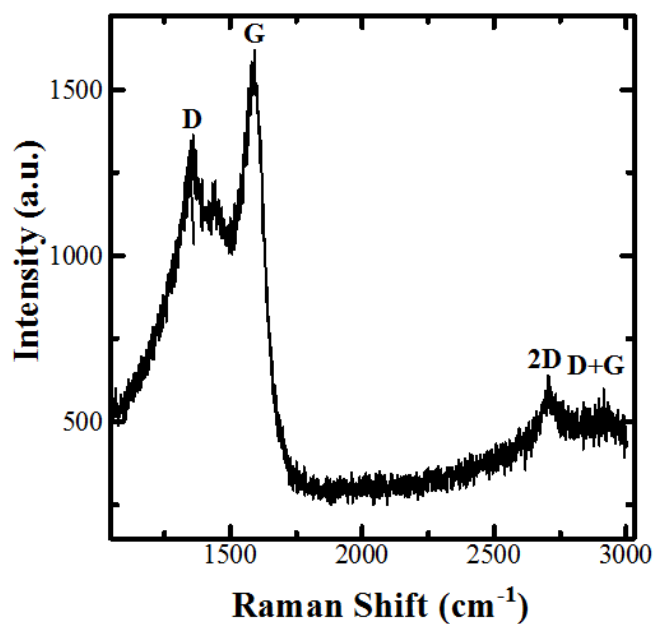

**Fig. S1** Raman spectra of G-CNTs hybrid on a Cu foil

The electroactive surface area of G-CNTs hybrid film both before and after the electrodeposition of copolymer film was calculated using Randles-Sevcik equation:

$$I_p = 2.69 \times 10^5 AD^{1/2}n^{3/2}v^{1/2}C$$

where  $n = 1$ , is the number of electrons participating in the redox reaction,  $A$  is the electroactive surface area ( $\text{cm}^2$ ),  $D = 6.70 \times 10^{-6} \text{ cm}^2 \text{ s}^{-1}$ , is the diffusion coefficient of  $[\text{Fe}(\text{CN})_6]^{3-}$  in solution,  $C = 0.002 \text{ M}$  corresponds to the concentration of the redox probe ( $\text{K}_3[\text{Fe}(\text{CN})_6]$ ), and  $v$  is the scan rate of the potential perturbation ( $\text{V s}^{-1}$ ). The electroactive surface area for G-CNTs and polymer modified G-CNTs hybrid film were found to be  $16.1 \times 10^{-5}$  and  $14.5 \times 10^{-5} \text{ cm}^2$ .
